# Supplementary material for: Design of molecularly imprinted conducting polymer protein-sensing films via substrate–dopant binding
Source: Royal Society of Chemistry journal article supplement (doi:10.1039/c4an01965b), 2014-12-24
Supplement: c4an01965b1.pdf [file c4an01965b1.pdf]

*Design of molecularly imprinted conducting polymer protein-sensing films via substrate-dopant binding*  
**Supplementary Information**

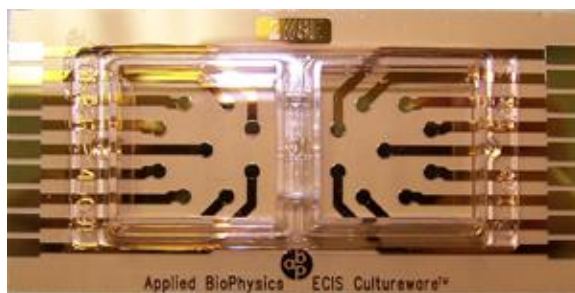

**Figure S1. Custom-made array electrode.** Gold-sputtered array electrode on plastic support with attached dual chamber used for electrochemical polymerization and testing of MICP films. Each side has 8 working electrodes (2mm diameter), positioned in a circle around the central electrode, which can be used as a counter or as additional working electrode, depending on a setup. The two sides are modified and measured independently in separate experiments. Individual electrodes modifications and incubations are carried out in 5 - 7  $\mu$ l drops. For electrochemical measurement the chamber is filled with electrolyte and fitted with a reference and a counter electrode. The array format allowed testing nine MICP films of different formulations in one experiment in equivalent conditions, along with the negative controls, offering rapid acquisition of experimental data.

|                                                                                                         |                                                                                                                                                                                                         |                                                                                                              |
|---------------------------------------------------------------------------------------------------------|---------------------------------------------------------------------------------------------------------------------------------------------------------------------------------------------------------|--------------------------------------------------------------------------------------------------------------|
| <p><b>Dopants</b></p> <p><b>Monomers</b></p>                                                            | 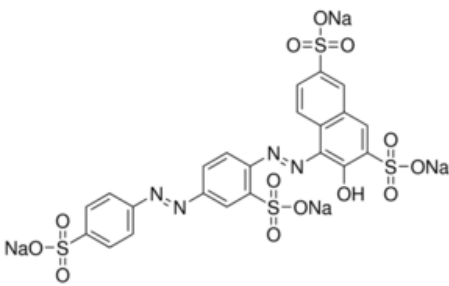 <p>Ponceau S</p>                                                                                                     | 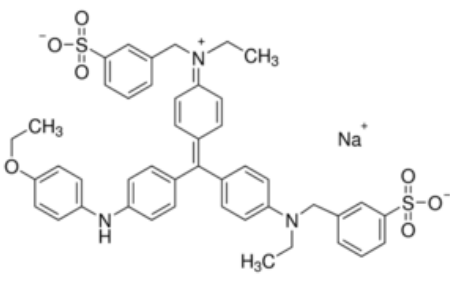 <p>Coomassie BB R250</p> |
| 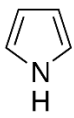 <p>Pyrrole (Py)</p> | 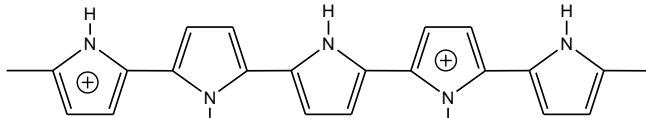 <p>pPY</p> 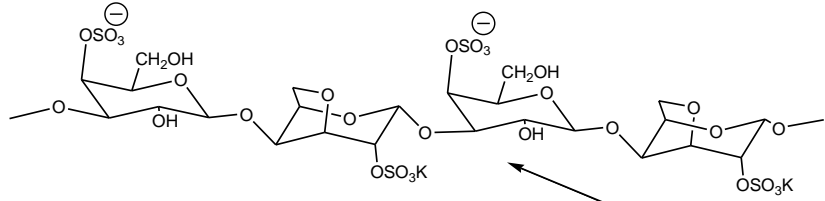 <p>Carrageenan</p> |                                                                                                              |

**Figure S2. Components used in MICP film preparations**

**Design of molecularly imprinted conducting polymer protein-sensing films via substrate-dopant binding**  
**Supplementary Information**

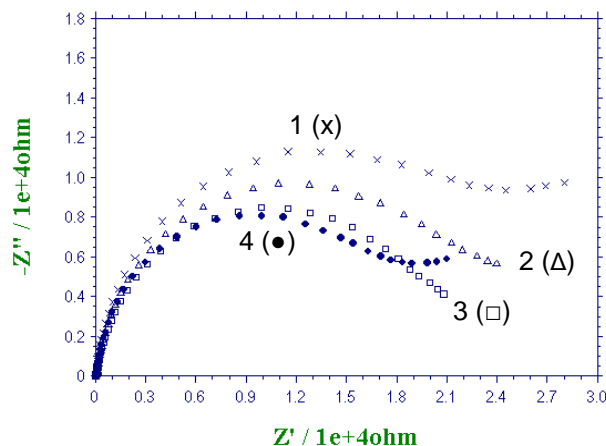

**Figure S3. Overoxidation of MICP pPy/Coomassie film imprinted with RTA.** 1: after pPy polymerization by CV; 2 and 3: two steps of overoxidation, 1 V for 1 min. each; 4: after protease treatment 2 h. and repeated PBS/SDS wash.

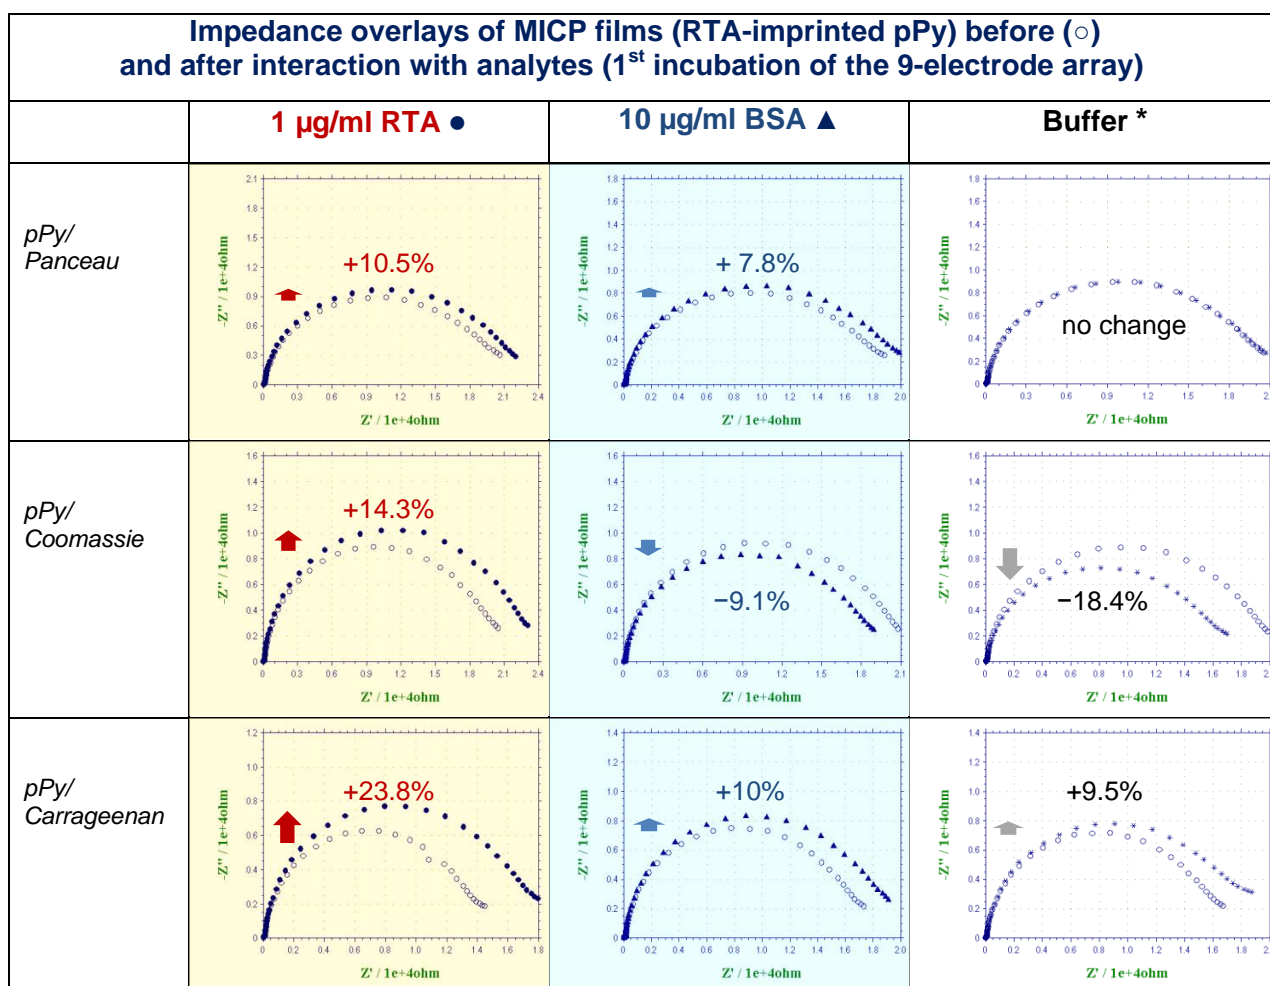

**Figure S4. AC Impedance data as overlaid Nyquist plots obtained on MICP Array.** RTA-imprinted pPy films obtained with various dopants on the array electrode were incubated for 30 min. with 1 μg/ml RTA, 10 μg/ml BSA as nonspecific control, or binding buffer. Impedance was measured before and after the incubation in the presence of 2.5 mM each Fe (II)/Fe(III) in PBS.

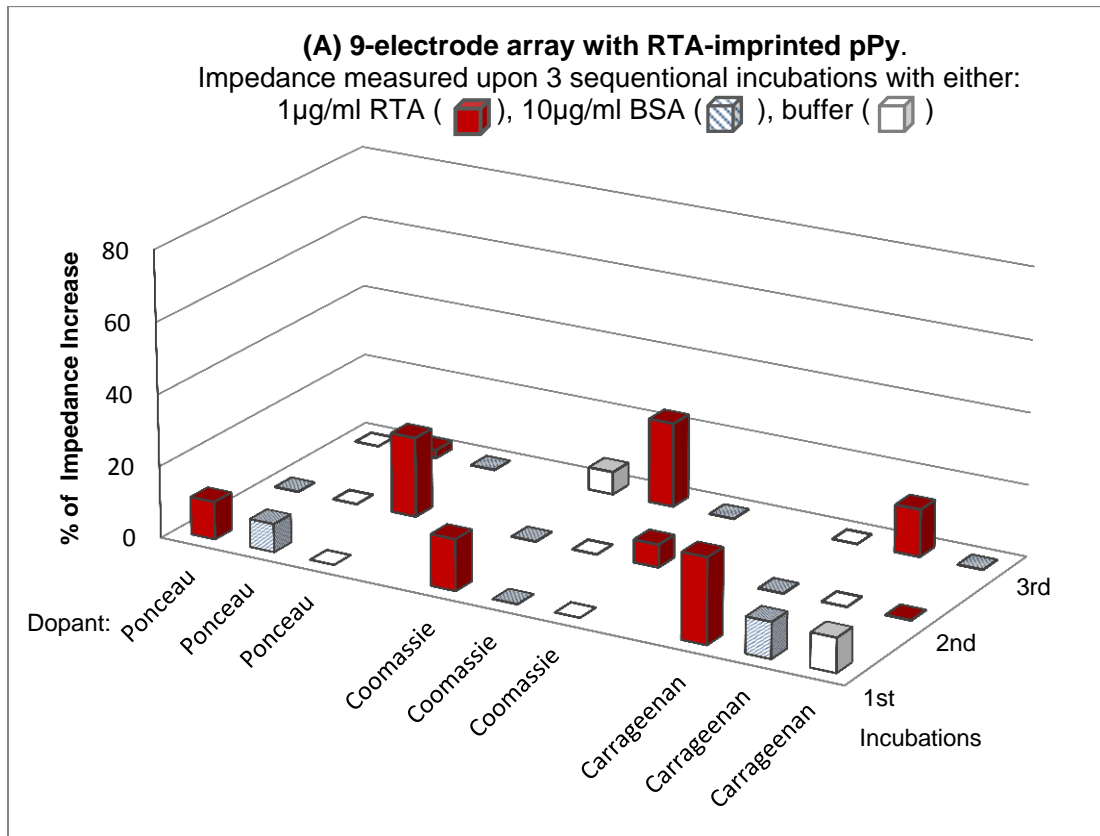

**Figure S5.** Specificity of RTA-imprinted MICP array towards RTA measured as % of Impedance increase, three consecutive incubations. pPy/ RTA-imprinted films obtained with various dopants on the array electrodes were incubated for 30 min. in either 1  $\mu\text{g/ml}$  RTA, 10  $\mu\text{g/ml}$  of BSA as nonspecific control, or binding buffer. Impedance was measured before and after the incubation. Protein binding to the MICP films calculated as % of Increase of  $-Z''$  values was plotted for each set.

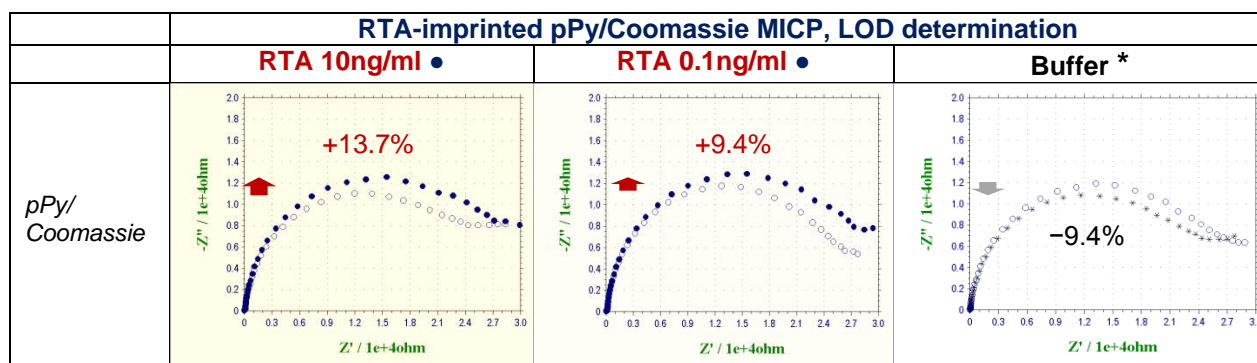

**Figure S6. LOD determination.** RTA-imprinted pPy/Coomassie films were exposed to dilutions of RTA to detect LOD. Impedance overlay before (○) and after (●) exposure to 10 ng/ml and 0.1 ng/ml RTA for 30 min. AC Impedance was measured in the presence of 2.5 mM each Fe(II)/ Fe(III) in PBS. Relative Impedance increase, resulting from RTA binding was measured as % ( $\Delta Z''$ ).

**Design of molecularly imprinted conducting polymer protein-sensing films via substrate-dopant binding**  
**Supplementary Information**

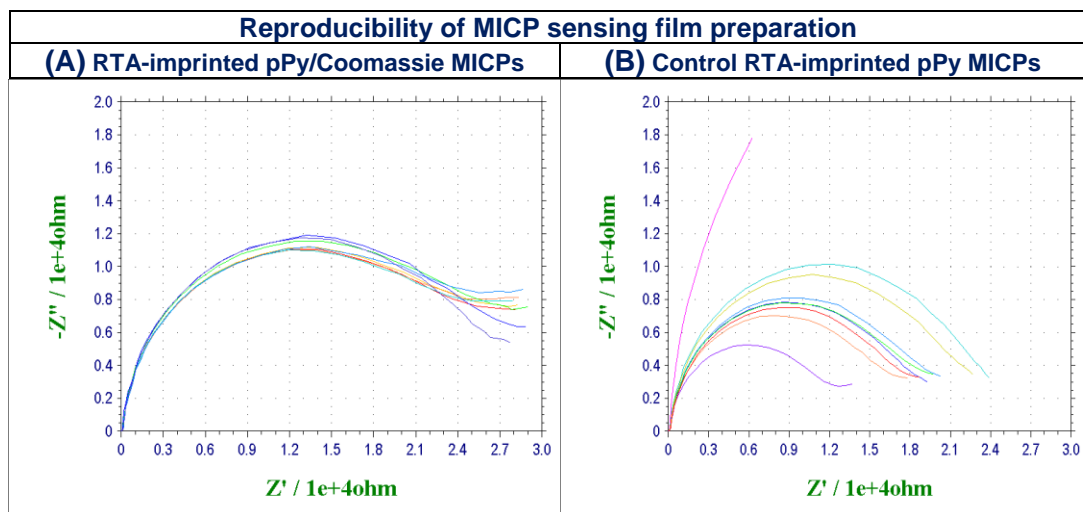

**Figure S7. Using macromolecular dopants increases MICP reproducibility.** MICP films were prepared on array electrodes in identical conditions except for Coomassie dopant. AC Impedance data as overlaid Nyquist plots obtained from **(A)** eight RTA-imprinted pPy/Coomassie MICPs and **(B)** nine RTA-imprinted pPy, all after proteinase K digestion and PBS/ Tween wash. Impedance was measured in the presence of 2.5 mM each Fe (II)/ Fe(III) in PBS.
